# Supplementary material for: Development of Crystalline Morphology and Its Relationship with Mechanical Properties of PP/PET Microfibrillar Composites Containing POE and POE-g-MA
Source: Polymers (Basel). 2018 Mar 8;10(3):291. doi: 10.3390/polym10030291 (PMC6414988; doi:10.3390/polym10030291)
Supplement: Supplementary file 1 [file polymers-10-00291-s001.pdf]

## Supporting information

### 2.1. Materials – datasheets

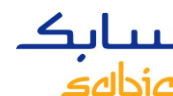

## PP 575P

### Product Description

PP 575P is specially developed for producing rigid injection molding articles for general purpose applications. It gives consistent processability and high gloss in the products.

### Typical Applications

PP 575P can be used mainly for houseware articles, caps, closures, containers and toys.

### Typical data

| Properties                                  | Unit              | Value <sup>(1)</sup> | ASTM Method |
|---------------------------------------------|-------------------|----------------------|-------------|
| <b>Resin Properties</b>                     |                   |                      |             |
| Melt Flow Rate @ 230°C & 2.16 kg load       | g/10 min.         | 11                   | D 1238      |
| Density @ 23°C                              | kg/m <sup>3</sup> | 905                  | D 792       |
| <b>Mechanical Properties <sup>(2)</sup></b> |                   |                      |             |
| Tensile Strength @ Yield                    | MPa               | 35                   | D 638       |
| Tensile Elongation @ Yield                  | %                 | 11                   | D 638       |
| Flexural Modulus (1% Secant)                | MPa               | 1600                 | D 790A      |
| Notched Izod Impact Strength @ 23°C         | J/m               | 22                   | D 256       |
| Rockwell Hardness, R-Scale                  | -                 | 104                  | D 785       |
| <b>Thermal Properties<sup>(2)</sup></b>     |                   |                      |             |
| Vicat Softening Point                       | °C                | 153                  | D 1525B     |
| Heat Deflection Temperature @ 455 KPa       | °C                | 98                   | D 648       |

(1) Typical values; not to be construed as specification limits.

(2) Based on injection molded specimens.

### Processing Conditions

Barrel temperature range: 200 - 225°C

Mold Shrinkage: 1.2 - 2.5% depending on wall thickness and processing conditions

Mold Temperature: Normally 15 - 40°C, upto 65°C for thick parts

### Food Regulation

PP 575P is suitable for Food contact application. Detailed information is provided in relevant Material Safety Datasheet and for additional specific information please contact SABIC local representative for certificate.

### Storage and Handling

PP resin should be stored to prevent a direct exposure to sunlight and/or heat. The storage area should also be dry and preferably don't exceed 50°C. SABIC would not give warranty to bad storage conditions which may lead to quality deterioration such as color change, bad smell and inadequate product performance. It is advisable to process PP resin within 6 months after delivery.

## LIGHTER C93

### Polyethylene Terephthalate (PET) Resins

LIGHTER<sup>TM</sup> resins are polyethylene terephthalate produced from PTA and MEG. These polymers are specifically designed for the production of beverage, food and other liquid containers and for thermoforming. There are several LIGHTER PET polymers, designed for the specific performance requirements of different applications, including very good mechanical properties, excellent clarity and a wide processing range on all injection and stretch blow molding machines.

LIGHTER C93 is suitable for the production of both mineral water and carbonated soft drinks bottles.

LIGHTER C93 is recommended also for the production of extruded thermoformable sheets.

LIGHTER C93, when used unmodified and processed under good manufacturing practices, should allow packaging article production in compliance with the laws and regulations for articles in contact with foodstuffs in force in the European Union and in the United States of America. Please contact your nearest Equipolymers office regarding food contact compliance statements. The purchaser remains responsible for determining whether the use complies with all relevant regulations.

| SALES SPECIFICATIONS   | Unit | Method     | LIGHTER C93 |
|------------------------|------|------------|-------------|
| Intrinsic Viscosity    | dl/g | 1/MA/1/002 | 0.80 ± 0.02 |
| Acetaldehyde           | ppm  | 1/MA/1/004 | 1 max.      |
| Color, coordinate b    |      | 1/MA/1/003 | 1.5 max.    |
| Fine Particles Content | ppm  | 1/MA/1/001 | 500 max.    |
| Moisture               | %    | 1/MA/1/005 | 0.4 max.    |

| TYPICAL VALUES               | Unit              | Method     | LIGHTER C93 |
|------------------------------|-------------------|------------|-------------|
| Bulk density                 | kg/m <sup>3</sup> | 1/MA/1/008 | 880         |
| Glass Transition Temperature | °C                | 1/MA/1/007 | 78          |
| Melting Point (peak)         | °C                | 1/MA/1/007 | 247         |
| Crystallinity                | %                 | 1/MA/1/018 | 50 min      |
| Weight of 100 Granules       | g                 | 1/MA/1/015 | 1.5         |
| ISO Viscosity Number         | ml/g              | ISO 1628/5 | 93          |

# Vistamaxx™ 6102

## Performance Polymer

### Product Description

Vistamaxx 6102 is primarily composed of isotactic propylene repeat units with random ethylene distribution, and is produced using ExxonMobil's proprietary metallocene catalyst technology. It has excellent elastomeric properties, is easy to process and is compatible with a wide variety of materials. It is particularly good for thermoplastic and polyolefinic blends where a balance of flexibility, transparency and impact performance is required.

### Key Features

- Suitable for a wide range of film and compounding applications.
- Other typical applications include calendered or extruded profiles, foamed or blown molded goods and thermoformed products.
- Excellent adhesion to conventional or metallocene PP and PE.
- Very good elasticity, toughness and melt strength.
- Very low seal initiation temperature combined with high seal strength when used as sealing layer of co-extruded structures.
- Very good chemical resistance and long term aging.
- RoHS compliant.

### General

|                           |                                                                                                                             |                                                                                                                    |                                                                         |
|---------------------------|-----------------------------------------------------------------------------------------------------------------------------|--------------------------------------------------------------------------------------------------------------------|-------------------------------------------------------------------------|
| Availability <sup>1</sup> | <ul style="list-style-type: none"> <li>• Africa &amp; Middle East</li> <li>• Asia Pacific</li> </ul>                        | <ul style="list-style-type: none"> <li>• Europe</li> <li>• Latin America</li> </ul>                                | <ul style="list-style-type: none"> <li>• North America</li> </ul>       |
| Applications              | <ul style="list-style-type: none"> <li>• Blown Film</li> <li>• Blown Molded Goods</li> <li>• Calendered Profiles</li> </ul> | <ul style="list-style-type: none"> <li>• Cast Film</li> <li>• Extruded Profiles</li> <li>• Foamed Goods</li> </ul> | <ul style="list-style-type: none"> <li>• PP/TPE Modification</li> </ul> |
| Uses                      | <ul style="list-style-type: none"> <li>• Compounding</li> </ul>                                                             | <ul style="list-style-type: none"> <li>• Film</li> </ul>                                                           | <ul style="list-style-type: none"> <li>• Packaging</li> </ul>           |
| RoHS Compliance           | <ul style="list-style-type: none"> <li>• RoHS Compliant</li> </ul>                                                          |                                                                                                                    |                                                                         |
| Form(s)                   | <ul style="list-style-type: none"> <li>• Pellets</li> </ul>                                                                 |                                                                                                                    |                                                                         |
| Revision Date             | <ul style="list-style-type: none"> <li>• 01/01/2017</li> </ul>                                                              |                                                                                                                    |                                                                         |

| Physical                                               | Typical Value (English) | Typical Value (SI)      | Test Based On     |
|--------------------------------------------------------|-------------------------|-------------------------|-------------------|
| Density <sup>2</sup>                                   | 0.862 g/cm <sup>3</sup> | 0.862 g/cm <sup>3</sup> | ASTM D1505        |
| Melt Index <sup>2</sup> (190°C/2.16 kg)                | 1.4 g/10 min            | 1.4 g/10 min            | ASTM D1238        |
| Melt Mass-Flow Rate (MFR) <sup>2</sup> (230°C/2.16 kg) | 3 g/10 min              | 3 g/10 min              | ExxonMobil Method |
| Ethylene Content                                       | 16 wt%                  | 16 wt%                  | ExxonMobil Method |

| Hardness                     | Typical Value (English) | Typical Value (SI) | Test Based On |
|------------------------------|-------------------------|--------------------|---------------|
| Durometer Hardness (Shore A) | 67                      | 67                 | ASTM D2240    |

| Mechanical                   | Typical Value (English) | Typical Value (SI) | Test Based On     |
|------------------------------|-------------------------|--------------------|-------------------|
| Tensile Stress at 100%       | 324 psi                 | 2.23 MPa           | ASTM D638         |
| Tensile Stress at 300%       | 402 psi                 | 2.77 MPa           | ASTM D638         |
| Tensile Strength at Break    | > 1100 psi              | > 7.58 MPa         | ASTM D638         |
| Tensile Set                  | 12 %                    | 12 %               | ExxonMobil Method |
| Elongation at Break          | > 800 %                 | > 800 %            | ASTM D638         |
| Flexural Modulus - 1% Secant | 2090 psi                | 14.4 MPa           | ASTM D790         |

| Elastomers            | Typical Value (English) | Typical Value (SI) | Test Based On |
|-----------------------|-------------------------|--------------------|---------------|
| Tear Strength (Die C) | 190 lbf/in              | 33.3 kN/m          | ASTM D624     |

| Thermal                     | Typical Value (English) | Typical Value (SI) | Test Based On     |
|-----------------------------|-------------------------|--------------------|-------------------|
| Vicat Softening Temperature | 129 °F                  | 53.9 °C            | ExxonMobil Method |

**Vistamaxx™ 6102**  
Performance Polymer**Additional Information**

For data specific to chemical resistance, refer to the Technical Literature (TL), Chemical Resistance of Vistamaxx Performance Polymer.

Please contact Customer Service for food law compliance information.

**Legal Statement**

This product, including the product name, shall not be used or tested in any medical application without the prior written acknowledgement of ExxonMobil Chemical as to the intended use. For detailed Product Stewardship information, please contact Customer Service.

**Processing Statement**

Vistamaxx polymers have a wide temperature processing window. A good starting point for temperatures is 10°C above the highest melting point. This material does not require drying and can be compounded or used in a dry blend. Use conventional processing knowledge to ensure mixing of the materials.

**Notes**

Typical properties: these are not to be construed as specifications.

<sup>1</sup> Product may not be available in one or more countries in the identified Availability regions. Please contact your Sales Representative for complete Country Availability.

<sup>2</sup> Property specified in conventional unit of measure.

For additional technical, sales and order assistance: [www.exxonmobilchemical.com/ContactUs](http://www.exxonmobilchemical.com/ContactUs)

©2018 ExxonMobil. ExxonMobil, the ExxonMobil logo, the interlocking "X" device and other product or service names used herein are trademarks of ExxonMobil, unless indicated otherwise. This document may not be distributed, displayed, copied or altered without ExxonMobil's prior written authorization. To the extent ExxonMobil authorizes distributing, displaying and/or copying of this document, the user may do so only if the document is unaltered and complete, including all of its headers, footers, disclaimers and other information. You may not copy this document to or reproduce it in whole or in part on a website. ExxonMobil does not guarantee the typical (or other) values. Any data included herein is based upon analysis of representative samples and not the actual product shipped. The information in this document relates only to the named product or materials when not in combination with any other product or materials. We based the information on data believed to be reliable on the date compiled, but we do not represent, warrant, or otherwise guarantee, expressly or impliedly, the merchantability, fitness for a particular purpose, freedom from patent infringement, suitability, accuracy, reliability, or completeness of this information or the products, materials or processes described. The user is solely responsible for all determinations regarding any use of material or product and any process in its territories of interest. We expressly disclaim liability for any loss, damage or injury directly or indirectly suffered or incurred as a result of or related to anyone using or relying on any of the information in this document. This document is not an endorsement of any non-ExxonMobil product or process, and we expressly disclaim any contrary implication. The terms "we," "our," "ExxonMobil Chemical" and "ExxonMobil" are each used for convenience, and may include any one or more of ExxonMobil Chemical Company, Exxon Mobil Corporation, or any affiliate either directly or indirectly stewarded.

[exxonmobilchemical.com](http://exxonmobilchemical.com)

## Acti-Tech® 16MA13

### Product description

This Acti-Tech grade is a maleated propylene copolymer that can be used for the following applications:

- Soft compatibilizer for polar/unpolar polymers alloys
- Impact modifier of stiff polar engineering plastics
- Coupling agent for mineral HFFR fillers
- Coupling agent for WPC or glass-fiber reinforced PP

Due to the chemical nature of its backbone, Acti-Tech xxMAyy is compatible with most of polyolefins, i.e. PE, PP, EVA, EBA or POE.

| Physical                 | Typical Value (SI)     | Test     |
|--------------------------|------------------------|----------|
| Density                  | 0.86 g/cm <sup>3</sup> | ISO 1183 |
| Maleic Anhydride content | 1.3%                   | FTIR     |
| MVR (190°C/2.16kg)       | 8.5 cc/10 mn           |          |

### Processing Information

This material can be processed on any conventional extruder. Typical addition level is 5 to 15%.  
This material does not require drying prior to processing.

### Contact information

Nordic Grafting Company A/S  
Søholm Park 1  
DK 2900 Hellerup

Telephone: +45 35 43 88 43  
Telefax: +45 35 43 99 43

### 3.2. Development of crystalline morphologies

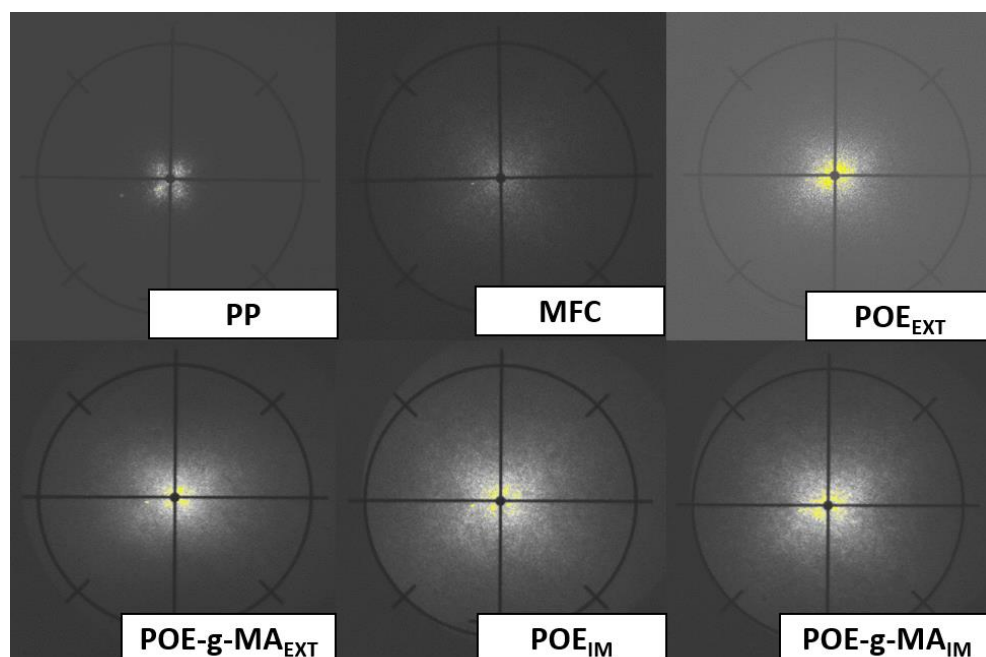

Figure S1. SALS patterns of the samples.

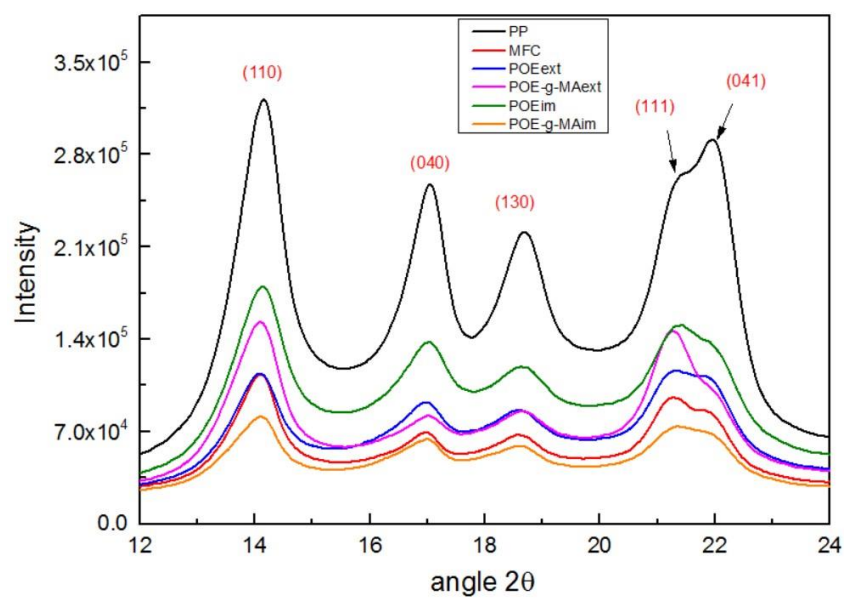

Figure S2. XRD spectra of the samples.

### 3.3. Crystallinity development

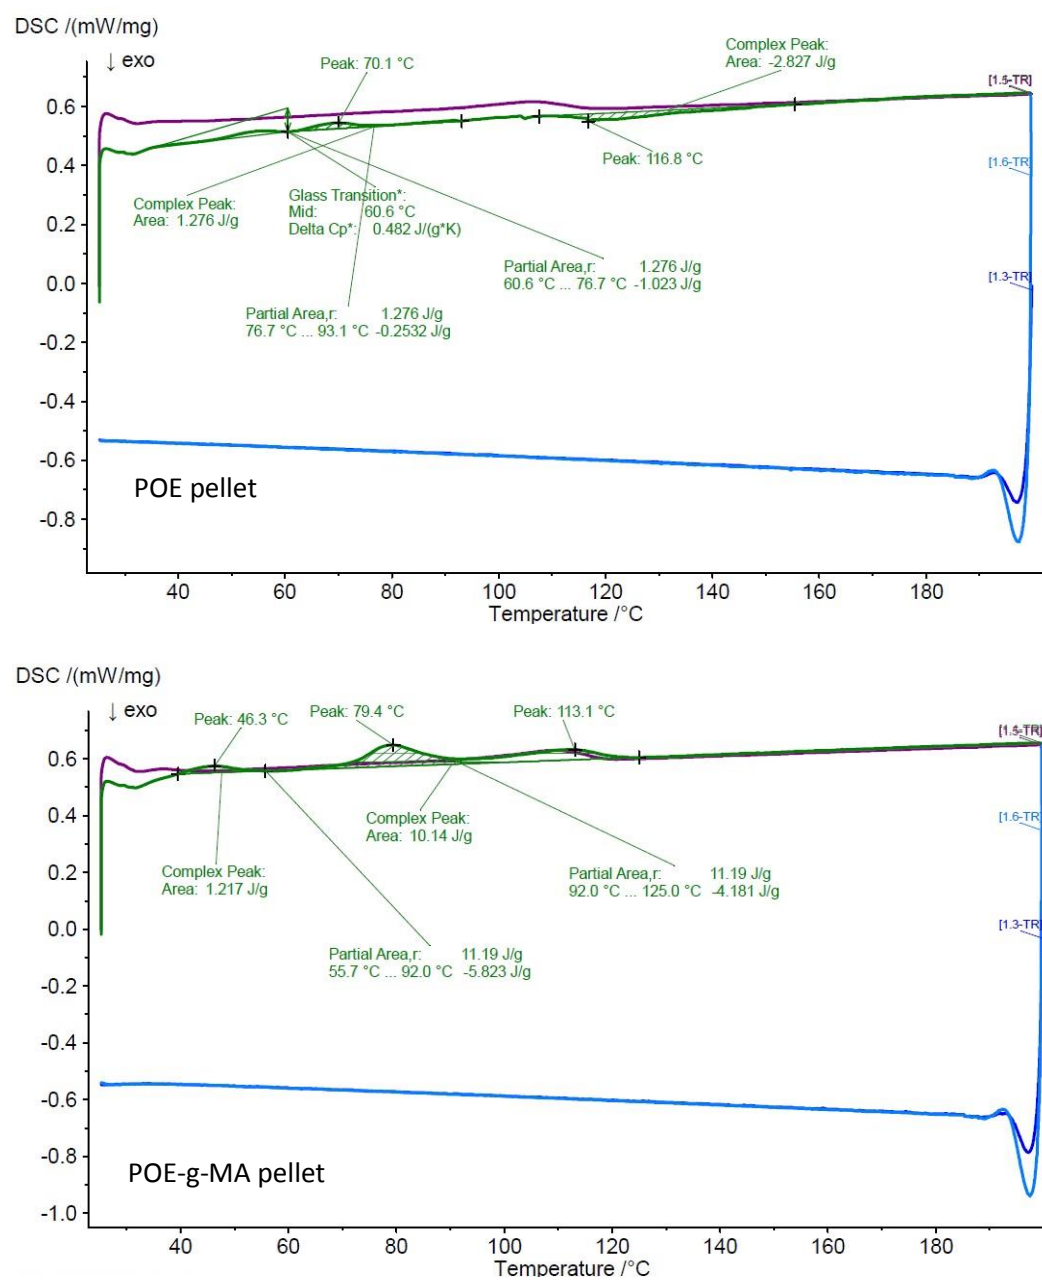

Figure S3. DSC graphs of POE and POE-g-MA pellets
